# 1 **Substrate ligand density modulates gap junction intercellular communication** 2 **during mesenchymal cell condensation**

3 Ignasi Casanellas<sup>a,b,c</sup>, Anna Lagunas<sup>c,a\*</sup>, Yolanda Vida<sup>d,e</sup>, Ezequiel Pérez-Inestrosa<sup>d,e</sup>, Cristina Rodríguez-  
4 Pereira<sup>f</sup>, Joana Magalhaes<sup>c,f</sup>, José A. Andrades<sup>g,c,e</sup>, José Becerra<sup>g,c,e</sup>, Josep Samitier<sup>a,b,c</sup>

5  
6 <sup>a</sup>Institute for Bioengineering of Catalonia (IBEC), Barcelona Institute of Science and Technology (BIST). c/ Baldiri  
7 Reixac, 10-12, 08028 Barcelona, Spain.

8 <sup>b</sup>Department of Electronics and Biomedical Engineering, University of Barcelona (UB), Faculty of Physics. c/ Martí  
9 i Franquès, 1, 08028 Barcelona, Spain.

10 <sup>c</sup>Biomedical Research Networking Center in Bioengineering, Biomaterials, and Nanomedicine (CIBER-BBN). Av.  
11 Monforte de Lemos, 3-5. Pabellón 11. Planta 0, 28029 Madrid, Spain.

12 <sup>d</sup>Universidad de Málaga - IBIMA, Dpto. Química Orgánica. Campus de Teatinos s/n, 29071 Málaga, Spain.

13 <sup>e</sup>Centro Andaluz de Nanomedicina y Biotecnología-BIONAND. Parque Tecnológico de Andalucía, c/ Severo Ochoa  
14 35, 29590 Campanillas, Málaga, Spain.

15 <sup>f</sup>Unidad de Medicina Regenerativa, Grupo de Investigación en Reumatología (GIR), Instituto de Investigación  
16 Biomédica de A Coruña (INIBIC), Complejo Hospitalario Universitario de A Coruña (CHUAC), Sergas,  
17 Universidade da Coruña (UDC). c/ Xubias de Arriba, 84, 15006 A Coruña, Spain.

18 <sup>g</sup>Department of Cell Biology, Genetics and Physiology, Universidad de Málaga (UMA), Instituto de Investigación  
19 Biomédica de Málaga (IBIMA). Av. Cervantes, 2, 29071 Málaga, Spain.

20 \*Corresponding author: [alagunas@ibecbarcelona.eu](mailto:alagunas@ibecbarcelona.eu)

21

## 22 **Abstract**

23 Gap junction intercellular communication (GJIC) provides a continuous and efficient flow of biological  
24 information during tissue formation and is essential to sustain homeostasis and function in living  
25 organisms. Cell-matrix interactions have been widely addressed and their influence on tissue organization  
26 is recognized. However, how extracellular matrix (ECM) adhesion affects intercellular communication  
27 during tissue formation remains elusive. Here we use substrates with uneven nanopatterns of adhesive  
28 ligand arginine-glycine-aspartic acid (RGD) to control cell adhesion during mesenchymal condensation, a  
29 prevalent morphogenetic transition. We show that the establishment of GJIC is an adhesion-gated  
30 mechanism, which is dynamically regulated. Substrate effects continuously propagate into the forming  
31 tissue through actomyosin contraction, affecting both the 3D architecture and functionality of the GJIC  
32 network developing in prechondrogenic condensates.

33

34 *Keywords:* Dendrimer-based nanopatterning, arginine-glycine-aspartic acid (RGD), cell adhesion,  
35 mesenchymal stem cells (MSCs), condensation, gap junction intercellular communication (GJIC).

## 36 **1. Introduction**

37  
38 Mesenchymal cell condensation is a prevalent morphogenetic transition regulated by cell adhesion in  
39 which mesenchymal stem cells (MSCs) gather to form intimate cell-to-cell contacts [1]. The condensation  
40 phase was named “membranous skeleton” by Grüneberg to stress its distinctive function in skeletal  
41 development [2]. During skeletogenesis, cell density increases locally at the condensation sites by means  
42 of extracellular matrix (ECM)-driven active cell movement,<sup>1</sup> with an important role of the ECM  
43 ubiquitous protein fibronectin (FN), which is upregulated during mesenchymal condensation [3,4]. Cell  
44 condensates progressively evolve into cartilaginous nodules, setting the bases for cartilage formation.

45 In osteochondral development, mesenchymal cell condensation is concurrent with the formation of an  
46 extensive gap junction (GJ) communication network [5]. GJs are plasma membrane channels that provide  
47 intercellular and cell-matrix communication in almost all animal tissues, allowing cells to exchange ions  
48 and small molecules through a controlled gating mechanism [6]. During morphogenesis, an efficient  
49 network of GJs is an extremely versatile communication system that mediates the rapid synchronization  
50 between cells. GJs established during embryonic patterning allow multicellular groups to coordinate  
51 towards the formation of supracellular, tissue-level structures. Avascular tissues, such as cartilage,  
52 particularly rely on this form of intercellular communication for successful development [7–9].

53 Although previous studies have related gap junction intercellular communication (GJIC) with matrix-  
54 associated proteins [10–13], little is known about how extracellular inputs modulate the formation of  
55 intercellular GJ networks and the associated implications in tissue architecture and function. Integrin-  
56 mediated cell-matrix interactions have been shown to regulate many biological processes such as cell  
57 shape, proliferation, migration, differentiation and programmed cell death [14–16]. During  
58 morphogenesis, dynamic adhesion mechanisms, together with the associated regulatory signalling  
59 pathways, define tissue differentiation and architecture, and modulate collective cell behaviour [17–19].

60 Cell adhesion is governed at the nanoscale, as evidenced by the assembly of collagen fibres in the ECM  
61 or the folding/unfolding of fibronectin [20–22], and also by the compartmentalization of the cell  
62 membrane receptors into nanoclusters, which facilitates the allosteric regulation, increases the ligand  
63 rebinding probability and triggers the assembly of signalling complexes in the cytosol [23]. The  
64 nanopatterning of ECM motifs for the study of cell-surface interactions at the nanoscale highlighted the  
65 relevance of ECM ligand presentation to cells. Experiments using micellar lithography to create  
66 nanopatterns of the cell adhesive peptide arginine-glycine-aspartic acid (RGD) of fibronectin (FN),  
67 unveiled a nanospacing threshold of around 70 nm for an efficient cell adhesion on stiff substrates, and  
68 demonstrated that cell adhesion is more affected by the local rather than the global ligand concentrations

69 [24–27]. Since these first works in the field, others have emerged showing that not only cell adhesion, but  
70 also many other cell responses are affected by the nanoscale ligand presentation [28].

71 In previous works, we have shown that a dendrimer-based RGD nanopatterning technique produces  
72 uneven nanopatterns of tuneable local surface adhesiveness with liquid-like order and defined spacing on  
73 large areas, thus being fully compatible with standard cell culture protocols [29]. Owing to steric  
74 hindrance restrictions, each dendrimer of 4-5 nm in diameter, although bearing up to eight copies of the  
75 RGD ligand, provides a single site for integrin receptor binding. Therefore, dendrimer nanopattern  
76 configuration directly correlates with the RGD available for cell adhesion. The local surface adhesiveness  
77 in the nanopatterns is obtained by quantifying the percentage of surface area with a minimum interparticle  
78 distance below the 70 nm threshold for an efficient cell adhesion. These nanopatterns proved to sustain  
79 cell adhesion more efficiently than the corresponding homogeneous surfaces [29] and improve cell  
80 differentiation [30–32].

81 Taking chondrogenesis as a model [33], we used the RGD dendrimer-based nanopatterns to conduct a  
82 systematic study of the influence of local surface adhesiveness on the establishment of GJIC network  
83 during mesenchymal 3D condensation. Results show that local surface adhesiveness triggers cell  
84 condensate responses from a threshold nanopattern configuration and we demonstrate that the adhesive  
85 substrate information, which is transduced by integrins, propagates within cell condensates in a  
86 continuous feedback mode through cytoskeletal contractility.

87

## 88 **2. Methods**

89

### 90 *2.1. Production of nanopatterned substrates*

91

92 All steps were performed in a sterile tissue culture hood, and only sterile materials, solutions and  
93 techniques were used. All dendrimer solutions were sonicated and filtered through a Millex RB sterile  
94 syringe filter (Merk Millipore) prior to use, and stock solutions were used within 6 months of preparation.  
95 Nanopatterned substrates were prepared as previously described [30,31]. Briefly, a 95/5 L-lactide/DL-  
96 lactide copolymer (Corbion) 2%  $\text{m v}^{-1}$  solution in dry 1,4-dioxane (Sigma-Aldrich, 296309) was spin-  
97 coated at 3000 rpm for 30 s on  $1.25 \times 1.25$  cm Corning® glass microslides (Sigma-Aldrich). Deionized  
98 water (18 M $\Omega$ -cm Milli-Q, Millipore) was used for rinsing samples and to prepare RGD-functionalized  
99 dendrimers' working solutions at  $2.5 \cdot 10^{-8}$ ,  $10^{-8}$  and  $4 \cdot 10^{-9}$ %  $\text{w w}^{-1}$  concentrations. Spin-coated on poly(L-  
100 lactic acid) (PLLA) substrates were treated for 13 min under UV light and immersed in dendrimer  
101 solutions for 16 h (pH = 5.6, T = 293 K). Then, the nanopatterned substrates were rinsed with copious

102 amounts of water and dried. Positive controls ( $S_{FN}$ ) were obtained by incubating spin-coated PLLA  
103 substrates with fibronectin ( $100 \mu\text{g mL}^{-1}$ ) from bovine plasma-solution (Sigma-Aldrich, F1141).  
104 Nanopatterned substrates were imaged by atomic force microscopy (AFM) in a Dimension 3100 AFM  
105 instrument (Veeco Instruments) operated in tapping mode at room temperature in air. Silicon AFM probes  
106 (Budget Sensors) with a spring constant  $k = 40 \text{ N m}^{-1}$  and a resonant frequency  $\nu = 300 \text{ kHz}$  were used. At  
107 least three images of  $5 \times 5 \mu\text{m}$  were taken per substrate of three independent substrates per condition  
108 (initial dendrimer concentration in solution). The AFM height images were processed with WSxM 4.0  
109 software [34]. Corresponding image thresholds were obtained manually and processed with ImageJ  
110 software (NIH). The resulting particle positions were used to obtain the minimum interparticle distances  
111 ( $d_{\min}$ ) using a custom-generated MATLAB code (The MATHWORKS, Inc.), and the corresponding  
112 probability contour plots for  $d_{\min}$  were constructed using an adapted MATLAB code [29]. At least three  
113 images from independent samples were computed. Quantification of the percentage of the area with a  $d_{\min}$   
114 threshold below  $70 \text{ nm}$  in the  $d_{\min}$  probability contour plots was performed by manually selecting the  
115 regions and processing them with ImageJ.

116

## 117 *2.2. Cell culture*

118

119 Human adipose-derived MSCs (ATCC, PCS-500-011) were cultured at  $37^\circ\text{C}$  and  $5\% \text{ CO}_2$  in MSC Basal  
120 Medium (ATCC, PCS-500-030) supplemented with MSC Growth Kit Low Serum (ATCC, PCS-500-  
121 040). Medium was replaced every 2 days. Passaging was carried out when cells reached 70-80%  
122 confluence. For the experiments, cells were trypsinized at passages 3 to 4, counted, resuspended in  
123 chondrogenesis-inducing medium Chondrocyte Differentiation Tool (ATCC, PCS-500-051) with  $0.1\% \text{ v}$   
124  $\text{v}^{-1}$  penicillin-streptomycin (Invitrogen, 15140), and seeded on nanopatterned and control substrates at a  
125 density of  $2,760 \text{ cells cm}^{-2}$ . 3 replicates of each condition were seeded. Medium was replaced every 3  
126 days.

127

## 128 *2.3. Immunostaining*

129

130 After 6 and 9 days of chondrogenic differentiation on the nanopatterns and controls, cells were carefully  
131 rinsed with PBS (Gibco, 21600-10), fixed with Formalin Solution (Sigma, HT5011) for 20 min at room  
132 temperature, and rinsed again twice with PBS. Aldehyde groups were blocked with  $50 \text{ mM}$  ammonium  
133 chloride (Sigma, A9434) in PBS for 20 min. Samples were permeabilized with saponin (Sigma, 47036)  
134  $0.1\% \text{ m v}^{-1}$  in BSA (Sigma, A3059)  $1\% \text{ m/v}$  in PBS for 10 min.

135 For connexin 43 (Cx43) and cell nuclei observation in cell condensates, samples were stained with rabbit  
136 anti-Cx43 (Abcam, ab63851) antibody at  $5 \mu\text{g mL}^{-1}$  in BSA 1% m v<sup>-1</sup> in PBS for 1 h at room temperature,  
137 then with anti-rabbit Alexa 568 (LifeTech, A11036) and Hoechst (Invitrogen, H3570)  $1 \mu\text{g mL}^{-1}$  in BSA  
138 1% m v<sup>-1</sup> in PBS for 1 h. Samples were prepared with coverslips in Fluoromount mounting medium  
139 (Sigma, HT5011).

140

#### 141 *2.4. Image acquisition and analysis*

142

143 Samples were imaged with a Leica SPE Upright Confocal Microscope (Leica Microsystems) with a  
144 40x/1.15 NA objective. The distance between imaged slices (z-size) was set at 1  $\mu\text{m}$ . At least 3 cell  
145 condensates were imaged for each sample.

146 Images were analyzed with ImageJ software. For condensate size measurements, a z-projection of each  
147 condensate was created, and the whole condensate area was manually selected and measured. For the  
148 measurement of Cx43 expression confocal z-projections were used (maximum stained area per sample).  
149 Briefly, the background of z-projections was removed, and a threshold was applied to select areas of  
150 Cx43 expression. The obtained total area was normalized against the area of the corresponding  
151 condensate.

152 For the analysis of GJIC network, a threshold was applied to the Cx43 confocal stack and then it was  
153 skeletonized with the ImageJ plugin (Fig. S1, Video S1). The resulting Cx43 network was analyzed to  
154 retrieve the number of end-point voxels and the mean branch length in each condensate, which were  
155 normalized to the Cx43 expression area and the number of slices taken for analysis. GJIC was calculated  
156 as the inverse value of the end-point voxels.

157

#### 158 *2.5. RNA extraction and retrotranscription*

159

160 Reverse transcription real-time PCR (RT-qPCR) was performed to measure Cx43 (*GJA1*) expression.  
161 After 6 and 9 days of differentiation, mRNA was extracted from the samples and purified with a RNeasy  
162 Micro Kit (Qiagen, 74004). Extracted mRNA was quantified in a Nanodrop ND-1000 Spectrophotometer  
163 (Thermo Fisher Scientific). Reverse transcription for cDNA production was performed with an iScript  
164 Advanced cDNA Synthesis Kit (Bio-Rad, 1725037) in a T100 Thermal Cycler (Bio-Rad). Three cell  
165 culture replicates of each condition were obtained, with their RNA extracted and retrotranscribed. The  
166 same procedure was performed on undifferentiated human mesenchymal stem cells (hMSCs) as a  
167 reference.

168

## 169 2.6. qPCR and data analysis

170  
171 qPCR was performed with the Sso Advanced Universal SYBR Green Supermix kit (Bio-Rad, 1725271)  
172 in an Applied Biosystems StepOnePlus Real-Time PCR Machine (Thermo Fisher Scientific). Commercial  
173 primer pairs were used for *GJA1* (Bio-Rad, qHsaCID0012977), as well as *B2M* (Bio-Rad,  
174 qHsaCID0015347) and *RPL24* (Bio-Rad, qHsaCID0038677) as housekeeping genes. To prevent gDNA  
175 amplification, a DNase digestion step was included during RNA extraction and intron-spanning primer  
176 pairs were selected. The amplification program consisted of an initial activation step of 30 s at 95°C,  
177 followed by 50 cycles of 10 s at 95°C for denaturation and 1 min at 60°C for annealing and extension, and  
178 a final denaturation step of 15 s at 95°C. Melt curves were performed from 65°C to 95°C in steps of 0.5°C.  
179 Technical duplicates of each sample were performed in the qPCR.

180 qPCR data were analyzed with qBase+ software version 3.1 (Biogazelle, Zwijnaarde, Belgium). Only  
181 samples with a Ct below 40 were considered for analysis. The expression of each gene was calculated by  
182 the  $2^{-\Delta\Delta C_t}$  method, normalized to that of undifferentiated hMSCs (assigned value 1) and presented as  
183 relative mRNA expression levels.

184

## 185 2.7. Neurobiotin (NB) assay

186  
187 A tracer assay was performed to analyze the functionality of GJIC networks. Three replicates of each  
188 condition were seeded in chondrogenesis-inducing medium, as described above. After 6 days of  
189 differentiation, samples were washed with HBSS buffer without calcium or magnesium (Life  
190 Technologies, 14175095) and treated with neurobiotin 2%  $m v^{-1}$  (Vector, SP-1120) in HBSS for 90 s at  
191 37°C. Samples were then washed with HBSS, fixed with Formalin Solution, permeabilized with saponin  
192 and stained with Streptavidin-Texas Red conjugate (Life Technologies, S872) and Hoechst 1  $\mu g mL^{-1}$  in  
193 BSA 1%  $m v^{-1}$  in PBS for 1 h at room temperature. Samples were imaged with a Leica SPE Upright  
194 Confocal Microscope as described above.

195 Images were analyzed with ImageJ software. A z-projection of each condensate was created, and  
196 background was removed. Distance of neurobiotin spread was measured in a straight line from the outer  
197 rim of the condensates' inwards, in at least two separate locations for each condensate.

198

## 199 2.8. Condensate transplantation assay

200  
201 Nanopatterns with 18% ( $S_{18}$ ) and 90% ( $S_{90}$ ) of local surface adhesiveness were used (Fig. S2 and Table  
202 S1). A transplantation assay was performed to study the effects of RGD nanopatterned substrates on

203 formed condensates and the propagation of the adhesive information from the substrate into cell  
204 condensates. Cells were cultured on the nanopatterns in chondrogenesis-inducing medium as described  
205 above. After 3 days, cell condensates formed on the nanopatterns of  $S_{90}$  were removed by pipetting and  
206 transferred to new  $S_{90}$  or  $S_{18}$  substrates. Transplanted condensates were cultured on the new substrates for  
207 another 3 days, to a total of 6 days of differentiation. For each sample, around half of the condensates  
208 were transplanted, whereas the other half were kept on the original substrate (not transplanted) as a  
209 control of unaltered differentiation. Three replicates of each condition were seeded and transplanted.  
210 Samples were fixed, immunostained, imaged and analyzed for Cx43 expression as described above.  
211 Results were normalized to those of non-transplanted  $S_{90}$  condensates (assigned value 1) and presented as  
212 relative values.  
213 To visualize condensates from the side (transversal cuts), Z-stacks were resliced and one image from the  
214 center of the condensate was selected. Cx43 production at the basal and top layers of condensates was  
215 measured by the average staining intensity at each region on unprocessed images. For each condensate,  
216 average basal intensity was divided by average top intensity to obtain the Basal/Top ratio, indicative of  
217 Cx43 distribution within condensates.

218

### 219 *2.9. Integrin blocking and myosin inhibition assays*

220

221 Three replicates of each condition were seeded in chondrogenesis-inducing medium as described above.  
222 For integrin blocking samples, medium was changed to fresh medium containing RGD dendrimers in  
223 solution at  $4 \cdot 10^{-9}\%$  w w<sup>-1</sup> after 5 days of differentiation. We selected this dendrimer concentration because  
224 it yields  $S_{18}$  substrates. During substrate functionalization, equilibrium is reached between dendrimer  
225 concentration in solution and adsorbed dendrimer density; hence, use of the concentration corresponding  
226 to the substrates with the lowest density prevents further adsorption mid-assay.

227 For the myosin inhibition experiment, medium was changed to fresh medium with  $50 \mu\text{g mL}^{-1}$   
228 blebbistatin (Sigma, B0560) 6 h before fixation.

229 All samples were fixed at day 6 of chondrogenesis, immunostained with anti-Cx43 antibody and Sir-  
230 Actin (Tebu-bio, SC001), and imaged with a Zeiss LSM780 Confocal Microscope (Zeiss Microscopy)  
231 with a 40x objective. Cx43 expression in condensates was quantified as described above and normalized  
232 to corresponding non-treated samples.

233

### 234 *2.10. Statistics*

235



236 Quantitative data are displayed, showing average and standard error of the mean (SEM).  $n$  is the sample  
237 size. Significant differences were judged using the One-way ANOVA with Fisher LSD post-hoc test or T-  
238 test when only two groups are compared, using OriginPro 8.5 or the Simple Interactive Statistical  
239 Analysis (SISA) online tool [35]. Where data did not pass a normality test, a Kruskal-Wallis test with  
240 Dunn means comparison was applied with GraphPad Prism 8.3. A  $p$  of less than 0.05 was considered  
241 statistically significant.

### 242 **3. Results**

243

#### 244 *3.1. Gap junction intercellular communication: Network architecture and functionality*

245

246 We seeded hMSCs on the nanopatterns in chondrogenic medium. Due to the poor interfacing of PLLA  
247 with living tissue [36], cells attached preferably through RGD-functionalized dendrimers. Pristine non-  
248 patterned PLLA ( $S_0$ ) and FN-coated ( $S_{FN}$ ) substrates were the negative and positive controls for cell  
249 adhesion, respectively. To control the local surface adhesiveness at the nanoscale during mesenchymal  
250 condensation, we used nanopatterns with 18% ( $S_{18}$ ), 45% ( $S_{45}$ ) and 90% ( $S_{90}$ ) of local surface  
251 adhesiveness (Fig. S2 and Table S1). Under chondrogenic stimuli, mesenchymal cells aggregate into  
252 three-dimensional condensates. While cells on pristine and nanopatterned substrates immediately start  
253 aggregating, cells on fibronectin-coated substrates proliferate and adopt a monolayer configuration, from  
254 which a few small condensates develop after 3 to 5 days (Fig. S3A) [30]. Condensates in  $S_{90}$  maintain  
255 their structure in culture up to day 14 (Fig. S3B) [37], while condensates in the rest of the substrates  
256 progressively collapse, with detached cells adopting a fibroblast-like morphology (Fig. S3C). We  
257 measured the distance between adjacent cell nuclei and found that condensates on high-adherence  
258 substrates ( $S_{90}$  and  $S_{FN}$ ) were packed together more tightly than those on low- and mid- adherence ones  
259 (Fig. S3D). In the case of large  $S_{90}$  condensates, this could be a factor explaining their resistance to  
260 collapse through day 14.

261 Intercellular communication through gap junctions is crucial for correct cartilage development. We have  
262 previously observed increased expression of chondrogenic markers on  $S_{90}$  substrates [30]; we thus  
263 wondered if ligand density effects could improve cartilage formation beyond individual cell  
264 differentiation. To examine cell-cell interconnectivity through GJ formation, we measured Cx43 in cell  
265 condensates. Cx43 is the most widely expressed and studied GJ protein [38] and modulates cartilage  
266 structure through its C-terminal cytosolic domain [39]. Connexin hemichannels, or connexons,  
267 accumulate and dock with apposed connexons from adjacent cells to form dense GJ plaques. GJIC largely  
268 depends on the size of GJ plaques [40] which are continuously regenerated by the addition of connexon



269 subunits at the edges and internalization from the center of the plaques [7,41,42]. Such a continuous  
270 renewal may ensure the maintenance of the established GJIC network.

271 We analysed the expression of *GJAI* at day 6 and 9 of chondrogenesis (Fig. 1A). *GJAI* was  
272 overexpressed on  $S_{90}$  to over twice the level of undifferentiated hMSCs at day 6 and reduced by half on  
273  $S_{FN}$ . However, expression on  $S_{90}$  levelled off at day 9 among the different nanopattern configurations and  
274  $S_0$ . *GJAI* expression in  $S_{18}$  and  $S_{45}$  nanopatterns is comparable to that of the negative control both at day 6  
275 and 9 of chondrogenic induction.

276 Cx43 immunofluorescent images show Cx43 assembled in GJ plaques. Quantification of the percentage  
277 of immunostained area showed higher values on  $S_{90}$  when compared to most other substrates at day 6 and  
278 a slight decrease at day 9, mirroring mRNA expression (Fig. 1B). The fact that Cx43 in GJ plaques on  $S_{90}$   
279 is not as high as mRNA expression at day 6 could be explained by a rapid initial turnover [12,41].  
280 Confocal z-projections (Fig. 1C, top) of immunostaining show that Cx43 GJ plaques were roughly  
281 distributed within the cell condensates with a tendency to accumulate in the outer cell layers, particularly  
282 in  $S_{45}$ .

283 Skeletonization of Cx43 immunostained images renders a 3D representation of the intercellular  
284 communication network (Fig. 1C, bottom, Fig. S1 and Video S1), from which the average branch length  
285 (Fig. S4) and number of branch terminations (end-point voxels) can be calculated. Shorter branches and  
286 fewer end-point voxels indicate a more intricately shaped GJIC network, as shown in the zoomed-in  
287 sections of the skeletonized images of condensates from  $S_{90}$  and  $S_0$  nanopatterns. We thus took the  
288 number of branch terminations as the inverse index for Cx43 architectural connectivity (Fig. 1D). At days  
289 6 and 9 of chondrogenic induction, connectivity progressively increased with local surface adhesiveness  
290 up to  $S_{90}$  and decreased for  $S_{FN}$ .

291 Observation of the spread of biotinylated or fluorescent tracers has become one of the most common  
292 methods of demonstrating gap junctions network coupling [43]. Therefore, to further assess GJIC, we  
293 conducted a neurobiotin (NB) tracer uptake assay in cell condensates (Fig. 1E). NB is a GJ/hemichannel  
294 permeable dye that can penetrate from the exposed Cx43 connexons and diffuse inwards across the GJIC  
295 network when  $Ca^{2+}$  is maintained below physiological levels (open channel conformation). Quantification  
296 of NB diffusion into cell condensates showed NB uptake is significantly higher in  $S_{90}$  nanopatterns and  
297 equal for all other substrates (Fig. 1F), thereby indicating that  $S_{90}$  condensates developed a more efficient  
298 GJIC network.

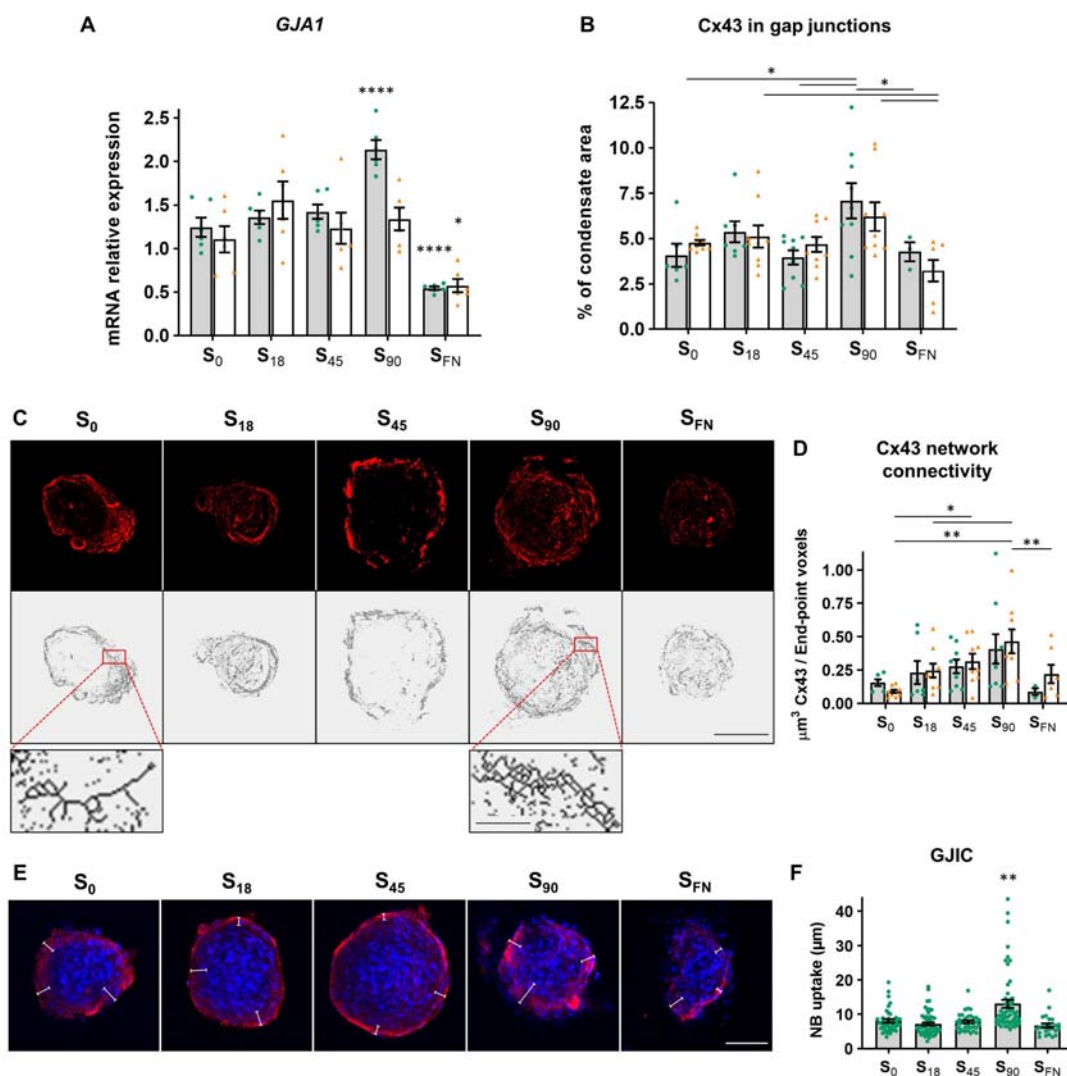

299 **Fig. 1: Ligand density modulates gap junction network architecture and function.** (A) Expression of  
 300 connexin 43 (*GJA1*) mRNA, relative to that of undifferentiated hMSCs (assigned value 1, not shown)  
 301 (n=6). (B) Percentage of Cx43-stained areas in cell condensates (n≥3). (C) Representative confocal z-  
 302 projections of Cx43 immunostaining (top) and the corresponding skeletonized images (bottom) revealing  
 303 the branched architecture of the intercellular connectivity network. Scale bar = 40 μm. Zoomed-in  
 304 sections for the skeletonized images of S<sub>0</sub> and S<sub>90</sub> highlighting the differences in the GJIC network. Scale  
 305 bar = 3 μm. (D) Quantification of Cx43 architectural network connectivity from skeletonized images  
 306 normalized against Cx43 in GJs (n≥3). (E) Representative confocal z-projections showing neurobiotin  
 307 (NB) tracer (red) in the mesenchymal condensates and cell nuclei stained with Hoechst (blue). White lines  
 308 represent measured distances of neurobiotin uptake. Scale bar = 80 μm. (F) Quantification of neurobiotin  
 309 tracer uptake in day 6 condensates after 90 s exposure (n≥24). Gray bars with green dots correspond to  
 310 day 6 of chondrogenic induction; white bars with orange triangles correspond to day 9. Results are given  
 311 as individual sample values with the mean ± SEM, \*p<0.05, \*\*p<0.01, \*\*\*\*p<0.0001

312 *3.2. Matrix adhesion continually regulates GJIC*

313  
314 Results showed an effect of local surface adhesiveness on the architecture and functionality of GJIC  
315 networks in pre-cartilaginous cell condensates. However, it was unclear whether substrate adhesion is  
316 relevant only at the beginning of condensation as a memory effect or if it continuously influences the  
317 tissue as it forms. To consider these two possibilities, we designed a transplantation assay in which  
318 condensates formed on S<sub>90</sub> and S<sub>18</sub>, (the nanopatterns of highest and lowest ligand density) were collected  
319 at day 3, plated on new S<sub>90</sub> and S<sub>18</sub> substrates and maintained for 3 more days in culture (Fig. 2A). The  
320 percentage of area immunostained for Cx43 (GJ plaques) was assessed at day 6 for the transplanted and  
321 non-transplanted condensates. Transplantation produced a significant boosting effect for condensates  
322 plated on new S<sub>90</sub> substrates (Fig. 2B). In condensates transplanted from S<sub>90</sub> to fresh S<sub>90</sub>, Cx43 production  
323 increased by 71±21%, while a 61±19% increase was observed for those transplanted from S<sub>18</sub>.  
324 Transplantation of either S<sub>90</sub> or S<sub>18</sub> condensates to fresh S<sub>18</sub> substrates did not render significant changes  
325 in Cx43 production.  
326 Condensates formed on one substrate and then transplanted to another will sense the new input only from  
327 the side in direct contact with the new substrate. We questioned if effects derived from changing substrate  
328 conditions would be confined to cells in direct contact with it (those at the basal layer of condensates) or  
329 instead propagate to the middle and top layers of condensates. Transversal views of transplanted  
330 condensates presented increased Cx43 production at all heights (Fig. 2C), showing that fresh substrate  
331 inputs spread through cells and modulate protein expression within the whole forming tissue. Moreover,  
332 the proportion of Cx43 production between the basal versus top regions was equal in control and  
333 transplanted condensates, indicating that transplantation did not alter the ratios of protein distribution  
334 among layers (Fig. 2D).

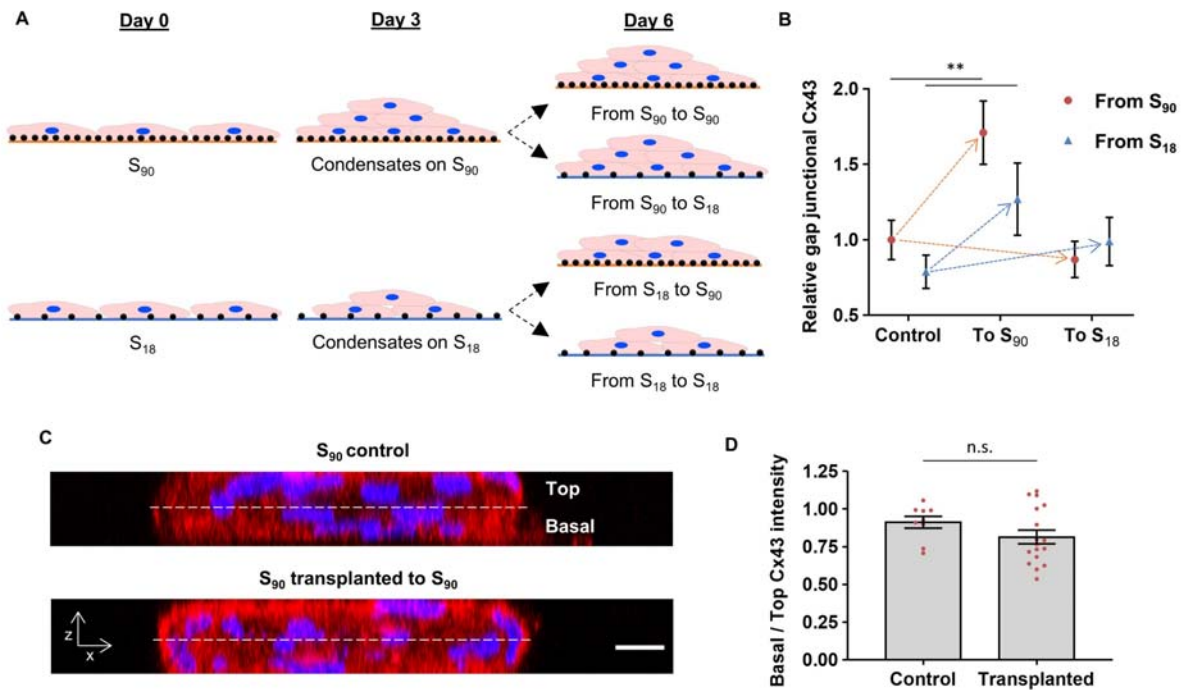

335 **Fig. 2: Cell condensates adapt to changing ligand density.** (A) Schematics of the transplantation  
 336 experiment. Condensates formed on  $S_{90}$  and  $S_{18}$  substrates were collected at day 3 and plated on fresh  $S_{90}$   
 337 or  $S_{18}$  substrates for 3 more days of chondrogenic induction. (B) Quantification of Cx43-stained  
 338 percentage area for non-transplanted and transplanted condensates ( $n \geq 7$ ). (C) Confocal side views of  
 339 control and transplanted  $S_{90}$  condensates, stained for Cx43 (red) and Hoechst (blue). Substrate effect  
 340 propagates to cells at all levels within condensates. Scale bar = 10  $\mu\text{m}$ . (D) Ratio between Cx43  
 341 production at the basal and top regions of  $S_{90}$  condensates in control  $S_{90}$  substrates or transplanted to fresh  
 342  $S_{90}$  ( $n \geq 9$ ). Results are given as mean  $\pm$  SEM,  $**p < 0.01$

343 *3.3. Mechanism of substrate sensing and input propagation*

344

345 Integrin adhesions are the main mediators of cell-matrix adhesion and mechanical interactions [44,45]. To  
346 evaluate their role in modulating GJIC on nanopatterns, we added RGD-functionalized dendrimers in  
347 solution on formed condensates to block integrin receptors at the cell membrane. Disturbance of integrin  
348 clustering at cell-substrate adhesion sites led to a Cx43 production decrease in S<sub>90</sub> but not in S<sub>18</sub> (Fig. 3A).  
349 This indicates that integrin-mediated cell adhesion is responsible for the transduction and regulation of  
350 substrate information that affects GJIC, and that cell response is triggered when integrins are engaged by  
351 the RGD configuration provided by S<sub>90</sub> nanopatterns.

352 Since perturbations at the cell membrane are transduced into chemical responses by propagation from  
353 integrins through the cytoskeleton [16], we hypothesized that the substrate adhesion information  
354 orchestrating GJIC during mesenchymal cell condensation propagates through the actin cortex. Cortical  
355 actin assembly can be observed in early mesenchymal condensates [30]. Cortical tension gradients are  
356 responsible for mesenchymal cell rearrangement during tissue formation and are essential in driving  
357 tissue morphogenesis [46,47]. The cell cortex is formed by an actomyosin network, which is located  
358 below the cell membrane. In the cortex, myosin-2 pulls on actin filaments and generates tension.  
359 Inhibition of myosin-2 activity can cause a decrease in cortical tension of up to 80% [47]. Treatment of 6-  
360 day condensates with the myosin-2 inhibitor blebbistatin decreased the percentage of area immunostained  
361 for Cx43 of S<sub>90</sub> condensates (Fig. 3A).

362 Adding dendrimers in solution affected cytoskeletal conformation in a similar manner as blebbistatin,  
363 preventing polymerization and resulting in a diffuse distribution of actin in condensates, instead of  
364 concentrating in clearly defined fibers as in control conditions (Fig. 3B). This shows that cytoskeletal  
365 tension depends on integrin receptors engaging adherence sites at the substrates; we thus infer that cells at  
366 the basal layer of condensates sense ligand inputs through integrins and propagate them by actin  
367 contractility to adjacent cells (Fig. 3C).

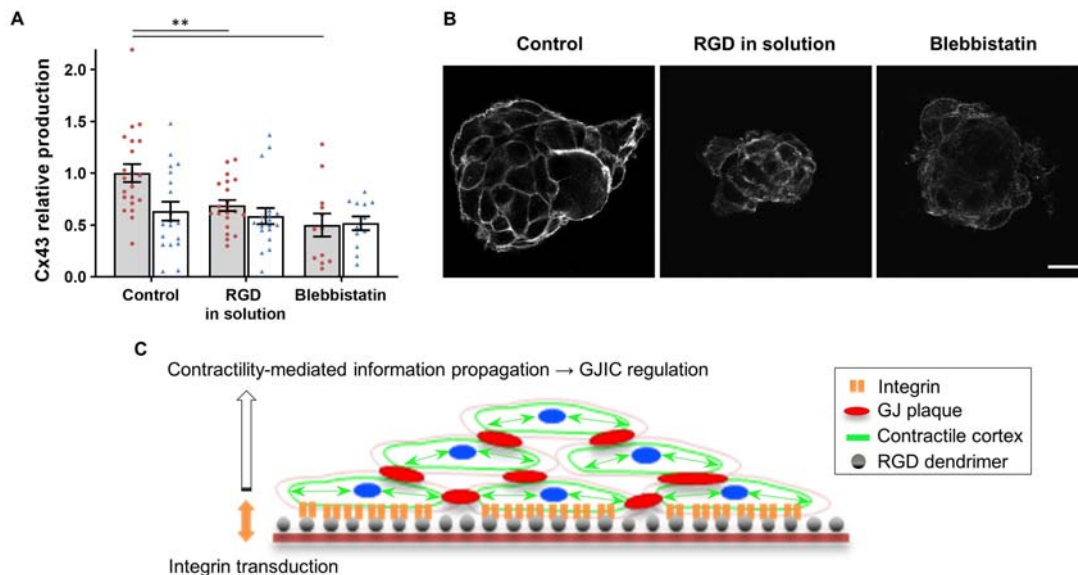

368  
369 **Fig. 3: Signal transduction and propagation.** (A) Relative Cx43 production in S<sub>90</sub> (gray bars, red dots)  
370 and S<sub>18</sub> (white bars, blue triangles) (n ≥ 12). Results are given as mean ± SEM, \*\*p < 0.01. (B) Actin  
371 staining for S<sub>90</sub> condensates at day 6 in control conditions, with RGD dendrimers in solution (integrin  
372 block) or with blebbistatin (myosin inhibition). Scale bar = 25 μm. (C) Schematic representation of ligand  
373 density sensing through integrin adhesions, followed by actomyosin contraction-guided propagation of  
374 information in cell condensates.

#### 375 376 4. Discussion

377  
378 We studied the effects of ECM adhesion in the establishment of GJIC during mesenchymal cell  
379 condensation, a prevalent morphogenetic transition. To this end, we used previously developed RGD  
380 dendrimer-based nanopatterns of tunable local surface adhesiveness [29,30]. Larger and more stable cell  
381 condensates are obtained on S<sub>90</sub> nanopatterns, with cells packed closer together.  
382 We analyzed the influence of substrate ligand density on the establishment of a gap junction intercellular  
383 communication (GJIC) network in cell condensates. We measured gene expression and assembly at gap  
384 junctions of Cx43, a connexin which is ubiquitously expressed in developing cartilage [39,48]. We found  
385 Cx43 increased with local surface adhesiveness in the nanopatterns, a similar interdependence to what we  
386 observed previously for the focal adhesion adaptor protein paxillin [30]. This is in agreement with Zhou *et*  
387 *al.*, who observed a direct interaction between FAK and paxillin with Cx43 in cells from the human apical  
388 papilla, which depended on substrate compliance [13]. In our case, cell condensates on S<sub>90</sub> nanopatterns



389 presented increased Cx43 expression with a higher protein turnover rate, revealing a direct effect of  
390 substrate ligand density on gap junction protein regulation.

391 We analyzed the architectural connectivity of Cx43 in condensates to assess whether substrate ligand  
392 density modulates the development of gap junction networks beyond protein expression. We found that  
393  $S_{90}$  condensates contain a Cx43 architecture that is more intricate, with less end-point voxels and shorter  
394 branches, indicative of improved communication capacities. Moreover, a tracer uptake assay revealed that  
395 GJIC is more efficient on  $S_{90}$  condensates. This shows that local surface adhesiveness given by the  
396 nanopattern configuration determines not only protein expression but also its spatial disposition during  
397 morphogenesis, affecting the functionality of the forming tissue. Given that  $S_{90}$  substrates also promote  
398 cell differentiation towards chondrocytes [30], we conclude that nanopatterning at this particular ligand  
399 density improves cartilage formation *in vitro*.

400 A condensate transplantation assay was designed to test whether cells in the condensate, previously in  
401 contact with the substrate during cell recruitment, retain initial substrate information (memory effect) or  
402 receive a continuous feedback of substrate input. Transplantation of cell condensates to a new  $S_{90}$   
403 substrate caused a significant increase in Cx43, suggesting that cell condensates still preserve a certain  
404 level of mesenchymal plasticity at early stages of chondrogenic differentiation [49], thereby allowing  
405 phenotype reconfiguration in response to the ECM input. No effects were observed for transplantation to  
406  $S_{18}$  substrates.

407 Effects of substrate transplantation on Cx43 expression were observed at all heights within condensates  
408 and transplanted condensates maintained the proportion of total protein contained at the basal and top  
409 regions, indicating that substrate inputs are propagated into the third dimension, across cells to the top.  
410 These results show that changing environmental conditions during morphogenesis continually modulate  
411 the characteristics of forming tissue, pointing to the importance of accounting for time variations in the  
412 design of experimental setups for development studies, as well as biomaterials for tissue engineering.

413 Finally, we addressed the biological mechanism by which cells sense substrate ligand density and  
414 propagate it into condensates. Blocking integrin-mediated interactions between the substrate and the basal  
415 layer in cell condensates caused a Cx43 decrease in  $S_{90}$  but not in  $S_{18}$ . This observation, together with  
416 results of condensate stability and GJIC, demonstrates that the establishment of GJIC during  
417 mesenchymal condensation is an adhesion-gated mechanism, in which  $S_{90}$  nanopattern configuration  
418 provides optimal ligand density and distribution to trigger cell response.

419 To investigate the propagation of substrate information within cell condensates, an inhibition experiment  
420 for myosin-2 was conducted. Inhibition of myosin-2 activity by blebbistatin caused a decrease of Cx43 in  
421  $S_{90}$  cell condensates, in agreement with previous reports [50]. This indicates that once integrins are  
422 engaged, the adhesion information from the substrate is transduced and propagates through the actin



423 filaments by myosin-2 mediated contraction, which in turn can regulate GJ accretion through ZO-1[12].  
424 Results agree with those from Gowrishankar *et al.*, who predicted that the dynamics of membrane  
425 proteins are regulated by the cell cortex [51]. Therefore, we propose a contractility-based mechanism for  
426 the propagation of ECM adhesion information within the condensates in which local substrate  
427 adhesiveness induces a rearrangement and adaptation of the actin cortex and cell-cell junctions in the first  
428 cell layers [52,53] and propagates through the tissue by myosin-2-mediated cortex contractions, regulating  
429 Cx43 dynamics during the mesenchymal condensation process (Fig. 3C).

430 Our findings clearly reflect the impact that the fine tuning of materials interfaces has in cell response. By  
431 tailoring the nanopattern configuration of the cell-adhesive motif RGD, we exerted control over the  
432 architecture and function of a complex dynamic biological system. The results have an immediate  
433 application to cartilage *in vitro* engineering [30,54], but they are also extensible to the study of other  
434 biological processes in which active ECM remodelling and thus, changes in the adhesion requirements  
435 and intercellular communication play an active role, such as in cancer progression [55].

436

#### 437 **CRedit author statement**

438 **I. Casanellas:** Conceptualization, Methodology, Investigation, Formal analysis, Writing – Original Draft,  
439 Visualization. **A. Lagunas:** Conceptualization, Methodology, Formal analysis, Writing – Original Draft,  
440 Supervision, Project administration, Funding acquisition. **Y. Vida:** Methodology, Resources (design and  
441 production of RGD-functionalized dendrimers), Writing – Review & Editing. **E. Pérez-Inestrosa:**  
442 Methodology, Resources (design and production of RGD-functionalized dendrimers), Writing – Review  
443 & Editing, Funding acquisition. **C. Rodríguez-Pereira:** Methodology, Investigation, Formal analysis  
444 (RT-qPCR), Writing – Review & Editing. **J. Magalhaes:** Methodology (RT-qPCR), Supervision, Writing  
445 – Review & Editing. **J. A. Andrades:** Writing – Review & Editing, Funding acquisition. **J. Becerra:**  
446 Writing – Review & Editing, Funding acquisition. **J. Samitier:** Conceptualization, Methodology, Writing  
447 – Review & Editing, Supervision, Project administration, Funding acquisition.

448

#### 449 **Funding**

450 This work was supported by the Biomedical Research Networking Center (CIBER), Spain. CIBER is an  
451 initiative funded by the VI National R&D&i Plan 2008–2011, Iniciativa Ingenio 2010, Consolider  
452 Program, CIBER Actions, and the Instituto de Salud Carlos III (RD16/0006/0012; RD16/0011/0022),  
453 with the support of the European Regional Development Fund (ERDF). This work was funded by the  
454 CERCA Program and by the Commission for Universities and Research of the Department of Innovation,  
455 Universities, and Enterprise of the Generalitat de Catalunya (2017 SGR 1079). This work has been  
456 developed in the context of the AdvanceCat project (COMRDI15-1-0013) with the support of ACCIÓ

457 (Catalonia Trade and Investment; Generalitat de Catalunya) under the Catalonian ERDF operational  
458 program 2014–2020. This work was funded by the Spanish Ministry of Economy and Competitiveness  
459 (MINECO) through the projects MINDS (Proyectos I+D Excelencia + FEDER): TEC2015-70104-P-P  
460 and BIOBOT (Programa Explora Ciencia / Tecnología): TEC2015- 72718-EXP, as well as the Spanish  
461 Ministry of Science and Education (PID2019-104293GB-I00), and the Consejería de Salud, Junta de  
462 Andalucía (UMA18-FEDERJA-007; UMA18□FEDERJA□133). The authors further acknowledge funds  
463 from the INTERREG V cooperation program for Spain–Portugal (POCTEP) 2014–2020 project  
464 (0245\_IBEROS\_1\_E). I. C. acknowledges support from MINECO through the Subsidies for Predoctoral  
465 Contracts for the Training of Doctors open call, co-funded by the European Social Fund (2016), grant  
466 number: BES-2016-076682. C. R-P. acknowledges support from i-PFIS Doctoral Program (IFI15/00151)  
467 funded by ISCIII.

468

#### 469 **Conflicts of interest**

470 There are no conflicts to declare.

471

#### 472 **Acknowledgements**

473 We thank N. Montserrat for help with the transplantation assay, R. Paoli for producing Video S1, and P.  
474 Roca-Cusachs for the fruitful discussions.

475

#### 476 **References**

477

- 478 [1] A.M. DeLise, L. Fischer, R.S. Tuan, Cellular interactions and signaling in cartilage development,  
479 *Osteoarthr. Cartil.* 8 (2000) 309–334. <https://doi.org/10.1053/joca.1999.0306>.
- 480 [2] H. Grüneberg, *The pathology of development: a study of inherited skeletal disorders in animals*,  
481 Blackwells Scientific Publications, Oxford, 1963.
- 482 [3] S. Christley, M.S. Alber, S.A. Newman, Patterns of mesenchymal condensation in a multiscale,  
483 discrete stochastic model, *PLoS Comput. Biol.* 3 (2007) 743–753.  
484 <https://doi.org/10.1371/journal.pcbi.0030076>.
- 485 [4] P. Singh, J.E. Schwarzbauer, Fibronectin and stem cell differentiation - lessons from  
486 chondrogenesis, *J. Cell Sci.* 125 (2012) 3703–3712. <https://doi.org/10.1242/jcs.095786>.
- 487 [5] C.N.D. Coelho, R.A. Kosher, Gap junctional communication during limb cartilage differentiation,  
488 *Dev. Biol.* 144 (1991) 47–53. [https://doi.org/https://doi.org/10.1016/0012-1606\(91\)90477-K](https://doi.org/https://doi.org/10.1016/0012-1606(91)90477-K).
- 489 [6] J.C. Hervé, M. Derangeon, Gap-junction-mediated cell-to-cell communication, *Cell Tissue Res.*  
490 352 (2013) 21–31. <https://doi.org/10.1007/s00441-012-1485-6>.

- 491 [7] J.C. Hervé, M. Derangeon, D. Sarrouilhe, B.N.G. Giepmans, N. Bourmeyster, Gap junctional  
492 channels are parts of multiprotein complexes, *Biochim. Biophys. Acta - Biomembr.* 1818 (2012)  
493 1844–1865. <https://doi.org/10.1016/j.bbamem.2011.12.009>.
- 494 [8] M.D. Mayan, R. Gago-Fuentes, P. Carpintero-Fernandez, P. Fernandez-Puente, P. Filgueira-  
495 Fernandez, N. Goyanes, V. Valiunas, P.R. Brink, G.S. Goldberg, F.J. Blanco, Articular  
496 chondrocyte network mediated by gap junctions: Role in metabolic cartilage homeostasis, *Ann.*  
497 *Rheum. Dis.* 74 (2015) 275–284. <https://doi.org/10.1136/annrheumdis-2013-204244>.
- 498 [9] H.J. Donahue, R.W. Qu, D.C. Genetos, Joint diseases: From connexins to gap junctions, *Nat. Rev.*  
499 *Rheumatol.* 14 (2018) 42–51. <https://doi.org/10.1038/nrrheum.2017.204>.
- 500 [10] P.D. Lampe, B.P. Nguyen, S. Gil, M. Usui, J. Olerud, W.G. Carter, Y. Takada, Cellular interaction  
501 of integrin  $\alpha 3\beta 1$  with laminin 5 promotes gap junctional communication, *J. Cell Biol.* 143 (1998)  
502 1735–1747. <https://doi.org/10.1083/jcb.143.6.1735>.
- 503 [11] N. Batra, S. Burra, A.J. Siller-Jackson, S. Gu, X. Xia, G.F. Weber, D. DeSimone, L.F. Bonewald,  
504 E.M. Lafer, E. Sprague, M.A. Schwartz, J.X. Jiang, Mechanical stress-activated integrin  $\alpha 5\beta 1$   
505 induces opening of connexin 43 hemichannels, *Proc. Natl. Acad. Sci.* 109 (2012) 3359–3364.  
506 <https://doi.org/10.1073/pnas.1115967109>.
- 507 [12] A.E. Zemljic-Harpf, J.C. Godoy, O. Platoshyn, E.K. Asfaw, A.R. Busija, A.A. Domenighetti, R.S.  
508 Ross, Vinculin directly binds zonula occludens-1 and is essential for stabilizing connexin-43-  
509 containing gap junctions in cardiac myocytes, *J. Cell Sci.* 127 (2014) 1104–1116.  
510 <https://doi.org/10.1242/jcs.143743>.
- 511 [13] C. Zhou, D. Zhang, W. Du, J. Zou, X. Li, J. Xie, Substrate mechanics dictate cell-cell  
512 communication by gap junctions in stem cells from human apical papilla, *Acta Biomater.* 107  
513 (2020) 178–193. <https://doi.org/10.1016/j.actbio.2020.02.032>.
- 514 [14] B.M. Gumbiner, Cell adhesion: The molecular basis of tissue architecture and morphogenesis,  
515 *Cell.* 84 (1996) 345–357. [https://doi.org/10.1016/S0092-8674\(00\)81279-9](https://doi.org/10.1016/S0092-8674(00)81279-9).
- 516 [15] J.T. Parsons, A.R. Horwitz, M.A. Schwartz, Cell adhesion: Integrating cytoskeletal dynamics and  
517 cellular tension, *Nat. Rev. Mol. Cell Biol.* 11 (2010) 633–643. <https://doi.org/10.1038/nrm2957>.
- 518 [16] M. Bachmann, S. Kukkurainen, V.P. Hytönen, B. Wehrle-Haller, Cell adhesion by integrins,  
519 *Physiol. Rev.* 99 (2019) 1655–1699. <https://doi.org/10.1152/physrev.00036.2018>.
- 520 [17] D.C. Van Essen, A tension-based theory of morphogenesis and compact wiring in the central  
521 nervous system, *Nature.* 385 (1997) 313–318. <https://doi.org/10.1038/385313a0>.
- 522 [18] M. Tada, M.L. Concha, Vertebrate gastrulation: Calcium waves orchestrate cell movements, *Curr.*  
523 *Biol.* 11 (2001) 470–472. [https://doi.org/10.1016/S0960-9822\(01\)00284-6](https://doi.org/10.1016/S0960-9822(01)00284-6).
- 524 [19] Hung Ping Shih, D. Panlasigui, V. Cirulli, M. Sander, ECM signaling regulates collective cellular

- 525 dynamics to control pancreas branching morphogenesis, *Cell Rep.* 14 (2016) 169–179.  
526 <https://doi.org/10.1016/j.celrep.2015.12.027>.
- 527 [20] F. Jiang, H. Hörber, J. Howard, D.J. Müller, Assembly of collagen into microribbons: Effects of  
528 pH and electrolytes, *J. Struct. Biol.* 148 (2004) 268–278. <https://doi.org/10.1016/j.jsb.2004.07.001>.
- 529 [21] M.L. Smith, D. Gourdon, W.C. Little, K.E. Kubow, R.A. Eguiluz, S. Luna-Morris, V. Vogel,  
530 Force-induced unfolding of fibronectin in the extracellular matrix of living cells, *PLoS Biol.* 5  
531 (2007) 2243–2254. <https://doi.org/10.1371/journal.pbio.0050268>.
- 532 [22] W.C. Little, M.L. Smith, U. Ebnetter, V. Vogel, Assay to mechanically tune and optically probe  
533 fibrillar fibronectin conformations from fully relaxed to breakage, *Matrix Biol.* 27 (2008) 451–  
534 461. <https://doi.org/10.1016/j.matbio.2008.02.003>.
- 535 [23] M.F. Garcia-Parajo, A. Cambi, J.A. Torreno-Pina, N. Thompson, K. Jacobson, Nanoclustering as a  
536 dominant feature of plasma membrane organization, *J. Cell Sci.* 127 (2014) 4995–5005.  
537 <https://doi.org/10.1242/jcs.146340>.
- 538 [24] M. Arnold, E.A. Cavalcanti-Adam, R. Glass, J. Blümmel, W. Eck, M. Kantlehner, H. Kessler, J.P.  
539 Spatz, Activation of integrin function by nanopatterned adhesive interfaces, *ChemPhysChem.* 5  
540 (2004) 383–388. <https://doi.org/10.1002/cphc.200301014>.
- 541 [25] E.A. Cavalcanti-Adam, T. Volberg, A. Micoulet, H. Kessler, B. Geiger, J.P. Spatz, Cell spreading  
542 and focal adhesion dynamics are regulated by spacing of integrin ligands, *Biophys. J.* 92 (2007)  
543 2964–2974. <https://doi.org/10.1529/biophysj.106.089730>.
- 544 [26] J.A. Deeg, I. Louban, D. Aydin, C. Selhuber-Unkel, H. Kessler, J.P. Spatz, Impact of local versus  
545 global ligand density on cellular adhesion, *Nano Lett.* 11 (2011) 1469–1476.  
546 <https://doi.org/10.1021/nl104079r>.
- 547 [27] R. Oria, T. Wiegand, J. Escribano, A. Elosegui-Artola, J.J. Uriarte, C. Moreno-Pulido, I. Platzman,  
548 P. Delcanale, L. Albertazzi, D. Navajas, X. Trepas, J.M. García-Aznar, E.A. Cavalcanti-Adam, P.  
549 Roca-Cusachs, Force loading explains spatial sensing of ligands by cells, *Nature.* 552 (2017) 219–  
550 224. <https://doi.org/10.1038/nature24662>.
- 551 [28] A. Lagunas, D. Caballero, J. Samitier, Influence of Controlled Micro□ and Nanoengineered  
552 Environments on Stem Cell Fate, in: A. Tiwari, B. Garipcan, L. Uzun (Eds.), *Adv. Surfaces Stem*  
553 *Cell Res.*, 1st ed., Hoboken: Wiley, 2016: pp. 87–141.
- 554 [29] A. Lagunas, A.G. Castaño, J.M. Artés, Y. Vida, D. Collado, E. Pérez-Inestrosa, P. Gorostiza, S.  
555 Claros, J.A. Andrades, J. Samitier, Large-scale dendrimer-based uneven nanopatterns for the study  
556 of local arginine-glycine-aspartic acid (RGD) density effects on cell adhesion, *Nano Res.* 7 (2014)  
557 399–409. <https://doi.org/10.1007/s12274-014-0406-2>.
- 558 [30] A. Lagunas, I. Tsintzou, Y. Vida, D. Collado, E. Pérez-Inestrosa, C. Rodríguez Pereira, J.

- 559 Magalhaes, J.A. Andrades, J. Samitier, Tailoring RGD local surface density at the nanoscale  
560 toward adult stem cell chondrogenic commitment, *Nano Res.* 10 (2017) 1959–1971.  
561 <https://doi.org/10.1007/s12274-016-1382-5>.
- 562 [31] I. Casanellas, A. Lagunas, I. Tsintzou, Y. Vida, D. Collado, E. Pérez-Inestrosa, C. Rodríguez-  
563 Pereira, J. Magalhaes, P. Gorostiza, J.A. Andrades, J. Becerra, J. Samitier, Dendrimer-based  
564 uneven nanopatterns to locally control surface adhesiveness: A method to direct chondrogenic  
565 differentiation, *J. Vis. Exp.* 131 (2018). <https://doi.org/10.3791/56347>.
- 566 [32] I. Casanellas, A. Lagunas, Y. Vida, E. Pérez-Inestrosa, J.A. Andrades, J. Becerra, J. Samitier,  
567 Matrix nanopatterning regulates mesenchymal differentiation through focal adhesion size and  
568 distribution according to cell fate, *Biomimetics.* 4 (2019).  
569 <https://doi.org/10.3390/biomimetics4020043>.
- 570 [33] B.E. Bobick, F.H. Chen, A.M. Le, R.S. Tuan, Regulation of the chondrogenic phenotype in  
571 culture, *Birth Defects Res. Part C - Embryo Today Rev.* 87 (2009) 351–371.  
572 <https://doi.org/10.1002/bdrc.20167>.
- 573 [34] I. Horcas, R. Fernández, J.M. Gómez-Rodríguez, J. Colchero, J. Gómez-Herrero, A.M. Baro,  
574 WSXM: A software for scanning probe microscopy and a tool for nanotechnology, *Rev. Sci.*  
575 *Instrum.* 78 (2007). <https://doi.org/10.1063/1.2432410>.
- 576 [35] D.G. Uitenbroek, *SISA Binomial*, (1997). [http://www.quantitativeskills.com/sisa/statistics/t-](http://www.quantitativeskills.com/sisa/statistics/t-test.htm)  
577 [test.htm](http://www.quantitativeskills.com/sisa/statistics/t-test.htm) (accessed January 30, 2020).
- 578 [36] Y. Zhu, C. Gao, X. Liu, T. He, J. Shen, Immobilization of Biomacromolecules onto Aminolyzed  
579 Poly(L-lactic acid) toward Acceleration of Endothelium Regeneration, *Tissue Eng.* 10 (2004) 53–  
580 61. <https://doi.org/10.1089/107632704322791691>.
- 581 [37] I. Casanellas, A. Lagunas, Y. Vida, P. Ezequiel, J.A. Andrades, J. Becerra, J. Samitier, The Janus  
582 role of adhesion in chondrogenesis, *Int. J. Mol. Sci.* 21 (2020) 5269.  
583 <https://doi.org/10.3390/ijms21155269>.
- 584 [38] T.M. Ribeiro-Rodrigues, T. Martins-Marques, S. Morel, B.R. Kwak, H. Girão, Role of connexin  
585 43 in different forms of intercellular communication - gap junctions, extracellular vesicles and  
586 tunnelling nanotubes, *J. Cell Sci.* 130 (2017) 3619–3630. <https://doi.org/10.1242/jcs.200667>.
- 587 [39] R. Gago-Fuentes, J.F. Bechberger, M. Varela-Eirin, A. Varela-Vazquez, B. Acea, E. Fonseca, C.C.  
588 Naus, M.D. Mayan, The C-terminal domain of connexin43 modulates cartilage structure via  
589 chondrocyte phenotypic changes, *Oncotarget.* 7 (2016) 73055–73067.  
590 <https://doi.org/10.18632/oncotarget.12197>.
- 591 [40] J.M. Rhatt, J. Jourdan, R.G. Gourdie, Connexin 43 connexon to gap junction transition is regulated  
592 by zonula occludens-1, *Mol. Biol. Cell.* 22 (2011) 1516–1528. [20](https://doi.org/10.1091/mbc.E10-</a></p></div><div data-bbox=)

- 593 06-0548.
- 594 [41] E. Leithe, S. Sirnes, T. Fykerud, A. Kjenseth, E. Rivedal, Endocytosis and post-endocytic sorting  
595 of connexins, *Biochim. Biophys. Acta - Biomembr.* 1818 (2012) 1870–1879.  
596 <https://doi.org/10.1016/j.bbamem.2011.09.029>.
- 597 [42] M. Piehl, C. Lehmann, A. Gumpert, J.-P. Denizot, D. Segretain, M.M. Falk, Internalization of  
598 Large Double-Membrane Intercellular Vesicles by a Clathrin-dependent Endocytic Process, *Mol.*  
599 *Biol. Cell.* 18 (2007) 337–347. <https://doi.org/10.1091/mbc.E06>.
- 600 [43] J. Jacoby, A. Nath, Z.F. Jessen, G.W. Schwartz, A Self-Regulating Gap Junction Network of  
601 Amacrine Cells Controls Nitric Oxide Release in the Retina, *Neuron.* 100 (2018) 1149-1162.e5.  
602 <https://doi.org/10.1016/j.neuron.2018.09.047>.
- 603 [44] Z. Sun, S.S. Guo, R. Fässler, Integrin-mediated mechanotransduction, *J. Cell Biol.* 215 (2016)  
604 445–456.
- 605 [45] J.Z. Kechagia, J. Ivaska, P. Roca-Cusachs, Integrins as biomechanical sensors of the  
606 microenvironment, *Nat. Rev. Mol. Cell Biol.* (2019). <https://doi.org/10.1038/s41580-019-0134-2>.
- 607 [46] M. Nishikawa, S.R. Naganathan, F. Jülicher, S.W. Grill, Controlling contractile instabilities in the  
608 actomyosin cortex, *Elife.* 6 (2017) 1–21. <https://doi.org/10.7554/eLife.19595>.
- 609 [47] H. Tao, M. Zhu, K. Lau, O.K.W. Whitley, M. Samani, X. Xiao, X.X. Chen, N.A. Hahn, W. Liu,  
610 M. Valencia, M. Wu, X. Wang, K.D. Fenelon, C.C. Pasilio, D. Hu, J. Wu, S. Spring, J. Ferguson,  
611 E.P. Karuna, R.M. Henkelman, A. Dunn, H. Huang, H.Y.H. Ho, R. Atit, S. Goyal, Y. Sun, S.  
612 Hopyan, Oscillatory cortical forces promote three dimensional cell intercalations that shape the  
613 murine mandibular arch, *Nat. Commun.* 10 (2019) 1–18. [https://doi.org/10.1038/s41467-019-](https://doi.org/10.1038/s41467-019-09540-z)  
614 [09540-z](https://doi.org/10.1038/s41467-019-09540-z).
- 615 [48] R.A. Meyer, M.F. Cohen, S. Recalde, J. Zakany, S.M. Bell, W.J.J. Scott, C.W. Lo, Developmental  
616 regulation and asymmetric expression of the gene encoding Cx43 gap junctions in the mouse limb  
617 bud., *Dev. Genet.* 21 (1997) 290–300. [https://doi.org/10.1002/\(SICI\)1520-](https://doi.org/10.1002/(SICI)1520-6408(1997)21:4<290::AID-DVG6>3.0.CO;2-2)  
618 [6408\(1997\)21:4<290::AID-DVG6>3.0.CO;2-2](https://doi.org/10.1002/(SICI)1520-6408(1997)21:4<290::AID-DVG6>3.0.CO;2-2).
- 619 [49] Y. Liu, N. Muñoz, A.C. Tsai, T.M. Logan, T. Ma, Metabolic Reconfiguration Supports  
620 Reacquisition of Primitive Phenotype in Human Mesenchymal Stem Cell Aggregates, *Stem Cells.*  
621 35 (2017) 398–410. <https://doi.org/10.1002/stem.2510>.
- 622 [50] S. Olk, G. Zoidl, R. Dermietzel, Connexins, cell motility, and the cytoskeleton, *Cell Motil.*  
623 *Cytoskeleton.* 66 (2009) 1000–1016. <https://doi.org/10.1002/cm.20404>.
- 624 [51] K. Gowrishankar, S. Ghosh, S. Saha, C. Rumamol, S. Mayor, M. Rao, Active remodeling of  
625 cortical actin regulates spatiotemporal organization of cell surface molecules, *Cell.* 149 (2012)  
626 1353–1367. <https://doi.org/10.1016/j.cell.2012.05.008>.

- 627 [52] N. Wang, J.D. Tytell, D.E. Ingber, Mechanotransduction at a distance: Mechanically coupling the  
628 extracellular matrix with the nucleus, *Nat. Rev. Mol. Cell Biol.* 10 (2009) 75–82.  
629 <https://doi.org/10.1038/nrm2594>.
- 630 [53] P. Chugh, E.K. Paluch, The actin cortex at a glance, *J. Cell Sci.* 131 (2018) 1–9.  
631 <https://doi.org/10.1242/jcs.186254>.
- 632 [54] C. Rodríguez-Pereira, A. Lagunas, I. Casanellas, Y. Vida, E. Pérez-Inestrosa, J.A. Andrades, J.  
633 Becerra, J. Samitier, F.J. Blanco, J. Magalhães, RGD-dendrimer-poly(L-lactic) acid nanopatterned  
634 substrates for the early chondrogenesis of human mesenchymal stromal cells derived from  
635 osteoarthritic and healthy donors, *Materials (Basel)*. 13 (2020).  
636 <https://doi.org/10.3390/ma13102247>.
- 637 [55] C. Bonnans, J. Chou, Z. Werb, Remodelling the extracellular matrix in development and disease,  
638 *Nat. Rev. Mol. Cell Biol.* 15 (2014) 786–801. <https://doi.org/10.1038/nrm3904>.  
639



**A****GJA1**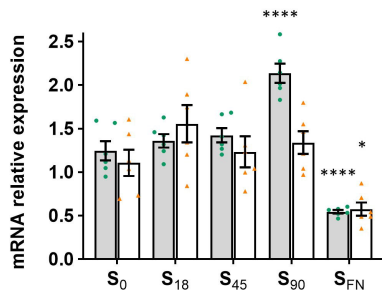**B****Cx43 in gap junctions**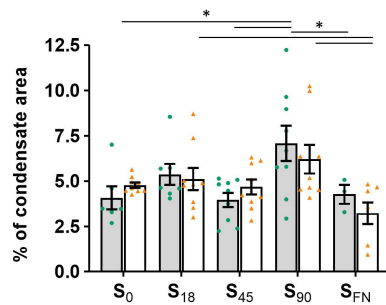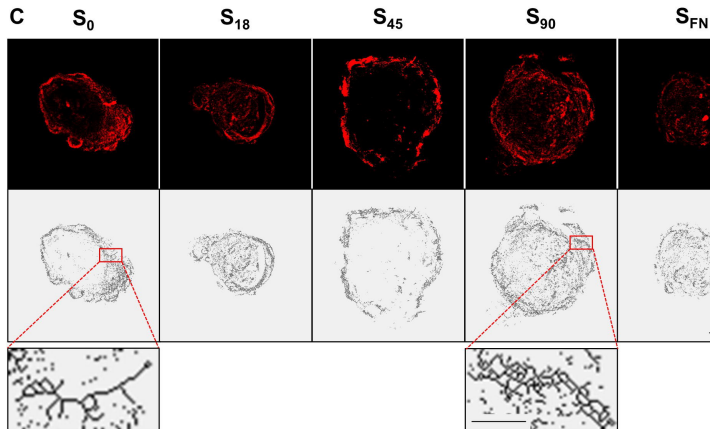**D****Cx43 network connectivity**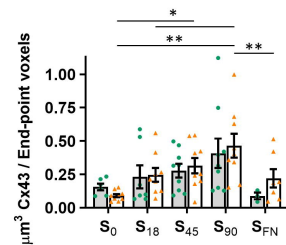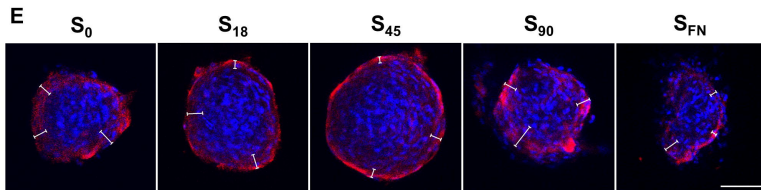**F****GJIC**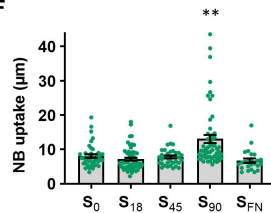

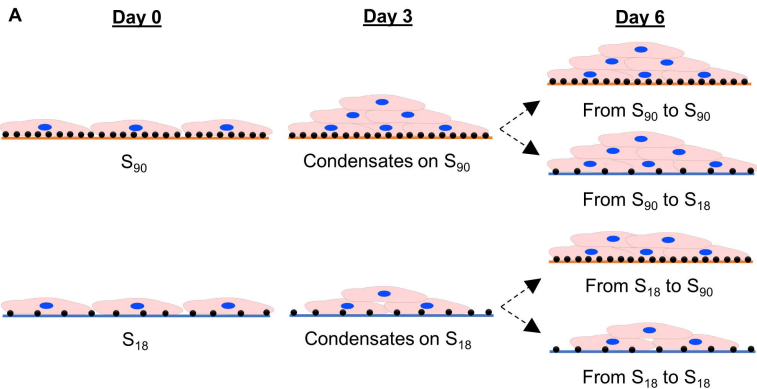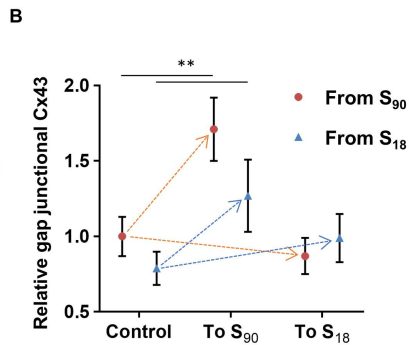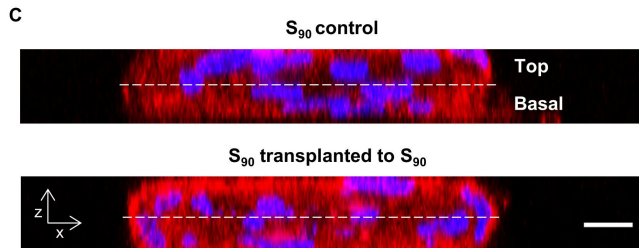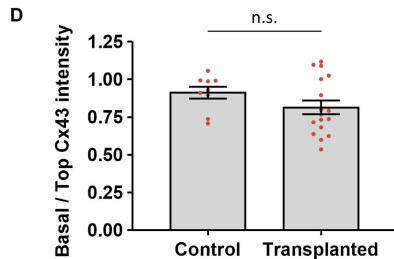

A

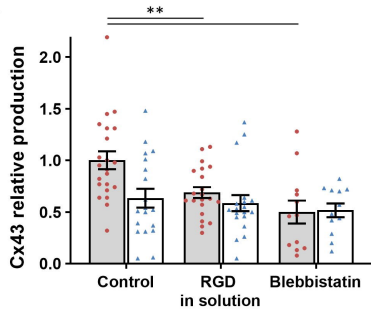

B

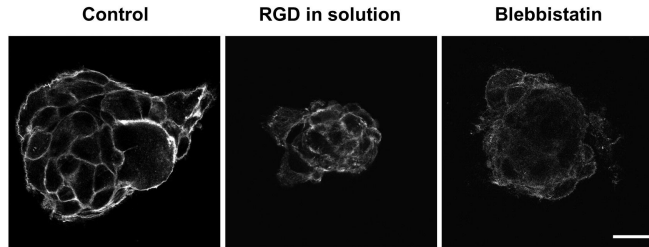

C

Contractility-mediated information propagation → GJIC regulation

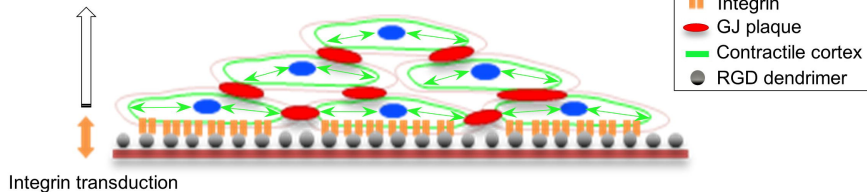

Source: https://www.biorxiv.org/content/biorxiv/early/2021/04/28/2021.04.28.441739.full.pdf
